1 ***“If I am free from diabetes, that itself will be the happiest thing”:***

2 **A convergent mixed methods study of the lived experiences of young**  
3 **adults with type 2 diabetes in Mysore district, India**

4  
5 Nikhita R. Gopisetty<sup>1\*</sup>, Kiranmayee Muralidhar<sup>2,3</sup>, Nagalambika Ningaiah<sup>2</sup>, Rani  
6 Chinnappa<sup>2</sup>, Mia Buono<sup>1</sup>, Poornima Jaykrishna<sup>2</sup>, Purnima Madhivanan<sup>2,4</sup>, Sumedha G.  
7 Ariely<sup>1†</sup>, Eve S. Puffer<sup>1,5†</sup>

8  
9 <sup>1</sup> Duke Global Health Institute, Duke University, Durham, North Carolina, United States  
10 of America

11 <sup>2</sup> Public Health Research Institute of India, Mysore, Karnataka, India

12 <sup>3</sup> JSS Academy of Higher Education and Research, Mysore, Karnataka, India

13 <sup>4</sup> Mel & Enid Zuckerman College of Public Health, University of Arizona, Tucson,  
14 Arizona, United States of America

15 <sup>5</sup> Department of Psychology and Neuroscience, Duke University, Durham, North  
16 Carolina, United States of America

17

18 \* Corresponding author: [nikhita.gopisetty@duke.edu](mailto:nikhita.gopisetty@duke.edu) (NRG)

19 † These authors contributed equally to this work.

## 20 **Abstract**

21 Type 2 diabetes (T2D) has been occurring at younger ages of onset around the world.  
22 India's population accounts for nearly 20% of the global disease burden. This study  
23 investigated the occurrence of depressive symptoms and qualitatively explored the  
24 lived experiences of 20 young adults living with T2D under the age of 35. We conducted  
25 a convergent mixed-methods study with the Patient Health Questionnaire (PHQ-9) and  
26 semi-structured interviews from June 2022 to July 2022 in Mysore district, India.  
27 Guided by the World Health Organization's Commission on Social Determinants of  
28 Health conceptual framework and biopsychosocial frameworks, areas of inquiry  
29 included knowledge and perception about T2D, accessibility of healthcare resources,  
30 T2D-related self-care activities, and the impact of the condition on their daily life.  
31 Interviews were debriefed by the research team and analyzed thematically using NVivo  
32 12. Participants were aged between 21 and 35 (mean: 30.8, SD: 4.2) and the majority  
33 were female (75%). Overall, 55% reported mild depression symptoms, 15% reported  
34 moderate to moderately severe depression symptoms; 5 participants (25%) reported  
35 suicidality. Sex, living in rural Mysore district, socioeconomic status, T2D duration,  
36 family history of T2D, T2D-induced complications, and T2D-related self-care behaviors  
37 were associated with depressive symptoms. Thematic analysis revealed 1) low  
38 knowledge about T2D, 2) substantial interpersonal and internalized stigma for having  
39 T2D at a young age, 3) financial and time constraints to seek and receive care, 4) self-

40 perception as burdens to family members due to the cost and stress of living with T2D,  
41 5) competing priorities with work and family, and 6) the power of social support in  
42 managing T2D. These themes were consistent across the sample, regardless of severity  
43 of depressive symptoms. Awareness campaigns and peer support programs may help  
44 reduce depressive symptoms and increase self-efficacy in this population.

45

46 **Keywords:** Type 2 Diabetes; Young Adult; Mental Health; India; Stigma; Depressive  
47 Symptoms

## 48 **Introduction**

49           Diabetes is a global epidemic – in 2019, over 450 million adults were estimated  
50 to be living with type 2 diabetes (T2D) and this number is predicted to exceed 700  
51 million by 2045 [1]. Almost 80% of people living with T2D live in low- and middle-  
52 income countries (LMICs); over 77 million people with T2D live in India, of which over  
53 50% are undiagnosed [2]. Diabetes is occurring at a younger age of onset and lower BMI  
54 levels across India and around the world. In rural Pondicherry, India, one third of new  
55 diabetes cases occur in people below 40 years old [3]. In younger populations living  
56 with T2D, comorbidities also occur at a younger age, including fatty liver disease and  
57 systolic hypertension [4]. Diabetes-related complications impact the physical, mental,  
58 and social well-being of patients, placing a burden on the healthcare system [5]. Sub-  
59 Saharan Africa, South America, and parts of Asia have yet to experience the  
60 epidemiological transition from communicable diseases to non-communicable diseases  
61 – India is an example to learn from before this occurs [6].

62           Prior research has established a bidirectional relationship between diabetes and  
63 depression [7–9]. In urban-based clinics around India, researchers found that one-  
64 quarter to one-third of patients with T2D were depressed. They predict that the  
65 prevalence of depression in people living with T2D might be higher in LMICs than high  
66 income countries [10]. Depressive disorders in people living with T2D are associated  
67 with the female gender, young age of onset, lower education levels, worse glycemic

68 control, a lack of physician advice about lifestyle modifications, and low social support  
69 [7,8,11–13]. Lower-income populations exhibit higher rates of depression, due to a lack  
70 of access to healthcare, higher likelihood of developing complications, and a low social  
71 awareness [14]. The comorbidity of depression and chronic disease is associated with  
72 worse physical disorder outcomes and quality of life [7,13].

73 Previous research has shown younger age to be significantly associated with  
74 diabetes distress in South India [15]. Young adults living with diabetes have been  
75 shown to have lower self-esteem than those without, due to social perceptions and  
76 preconceived notions about the condition [16]. Key emotions in young diabetics  
77 discussing their disease included denial, anger, depression, and guilt. They feared  
78 people would treat them differently and perceive them as sick, and experienced  
79 unsolicited advice and instructions about household remedies from family members  
80 and peers [17]. Diabetes occurring at a younger age is also associated with significant  
81 social stigma, due to societal and cultural misconceptions about the disease [18].

82 As T2D becomes more prevalent in younger populations, it is crucial to  
83 understand the various barriers to diabetes management and quality of life that they  
84 face. A conceptual model, derived from the WHO's Commission on Social Determinants  
85 of Health (CSDH) conceptual framework [19] and the biopsychosocial model [20], was  
86 developed to guide this study (Fig 1). The CSDH framework presents the relationships  
87 between structural and intermediary social determinants of health and equity in health

88 and well-being [19]. The biopsychosocial model of health and illness allows researchers  
89 to model any disease caused and impacted by biological, psychological, and social  
90 factors, revealing interactions between the mind and body [20]. The conceptual model  
91 below maps out various pathways between sociodemographic characteristics, structural  
92 and intermediary determinants, T2D-related self-care behaviors, physical health  
93 outcomes, and quality of life. Intermediary determinants -- including health literacy,  
94 access, social factors, and psychological factors -- are influenced by an individual's  
95 environment and directly impact self-care behaviors and health outcomes. The purpose  
96 of this study is to apply this conceptual model to explore the impact of intermediary  
97 determinants of health on the prevalence of depressive symptoms and lived  
98 experiences in young adults living with T2D in Mysore district, Karnataka, India.

99 **Fig 1. Conceptual model**

100

## 101 **Methods**

### 102 **Study design**

103 We used a convergent mixed-methods approach, with an emphasis on deeper  
104 understanding and analysis of qualitative themes [21]. Qualitative and quantitative  
105 data were collected concurrently and findings were interpreted with the intent of  
106 validating and describing relationships among the data. Approval was obtained from

107 Duke Campus Institutional Review Board (2022-0358) and the Public Health Research  
108 Institute of India's Institution Ethics Review Board (2022-01-29-64).

## 109 **Setting**

110 The study was conducted in Mysore, a district in southern Karnataka in India  
111 between June and July 2022. The Indian National Census in 2011 reported a total  
112 population of 3,001,127 in Mysore district, with approximately 58% living in rural  
113 villages [22]. The National Family Health Survey-5 (NFHS-5) from 2019 to 2021  
114 reported that India's population is young, which is typical of developing countries with  
115 a low life expectancy; over 50% of India's population is below the age of 30 [23]. The  
116 study was implemented in collaboration with the Public Health Research Institute of  
117 India (PHRII), a research and service-based organization in Mysore, Karnataka. PHRII  
118 has been conducting community-based research, providing health services, and  
119 training public health professionals in Mysore district for the past 15 years.

## 120 **Author positionality**

121 It is important to recognize the authors' positionality and, therefore, their  
122 interpretation of the data. The research team consisted of public health practitioners,  
123 academic researchers, physicians, administrative staff, a graduate student, and an  
124 undergraduate student. Seven members of the research team come from Indian  
125 backgrounds, two born in the United States and five born in India. Two members of the  
126 research team are United States-born White Americans with experience designing and

127 implementing research projects in global settings. All authors worked as a team to  
128 ensure the study was guided by their collective cultural knowledge and expertise.  
129 Positionality challenges related to sex, gender, race/ethnicity, power, socioeconomic  
130 status, and privilege were intentionally addressed throughout the research design and  
131 data collection processes through team-based reflection on how these issues might  
132 impact the interview process and data analysis.

### 133 **Eligibility and participant recruitment**

134 Young adults with T2D were recruited using convenience sampling between June  
135 6, 2022 and July 8, 2022. Participants were eligible to take part in the study if they were  
136 between 18 to 35 years old, self-reported to have T2D, live in Mysore district, able to  
137 speak English or Kannada, and able to provide informed consent. The research team  
138 consulted with Primary Health Centres, Accredited Social Health Activists (ASHAs),  
139 Urban Social Health Activists (USHAs), and the Karnataka Health Promotion Trust to  
140 identify potential participants who met the inclusion criteria. Alongside the ASHAs and  
141 USHAs, government-supported community health workers, the research team  
142 physically approached potential participants in their communities to inform them of  
143 the study. Written informed consent was obtained from the study participants after  
144 explaining the purpose of the study and reading through the content of the study  
145 information sheet and consent form. Of 21 eligible candidates that were approached,



146 one refused to participate in the study. This resulted in 20 eligible participants, 10 from  
147 urban and 10 from rural Mysore district.

## 148 **Measures**

### 149 **Quantitative**

150 Participants completed a demographic questionnaire that included  
151 sociodemographic characteristics, medical history information, and details regarding  
152 their diagnosis with T2D and related management. Participants were screened for  
153 depressive symptoms using the Patient Health Questionnaire-9 (PHQ-9) [24], a brief  
154 self-report instrument of depression severity that has been translated and validated for  
155 Indian populations in various languages [25]. The screening tool uses 9 questions  
156 scored on a 4-point Likert-scale ranging from 0 (not at all) to 3 (nearly every day) to  
157 examine symptoms over the past two-week period. Individual's PHQ-9 score was  
158 categorized: 1-4 minimal depression, 5-9 mild depression, 10-14 moderate depression,  
159 15-19 moderately severe depression, and 20-27 severe depression [24]. A single  
160 interviewer (NN) and observing notetaker (RC) verbally administered the surveys in  
161 *Kannada* and recorded responses through an offline Qualtrics survey.

### 162 **Qualitative**

163 A semi-structured interview guide (S1 File) was developed based on the  
164 conceptual model. This guide covered the following domains and themes: general  
165 knowledge and perception about T2D, accessibility to healthcare resources, self-care

166 behaviors related to T2D, impact of T2D on the individual, and impact of T2D on others  
167 around them. The interview guide was developed in English by the authors (NRG, KM,  
168 PJ, SA, ESP) and subsequently translated into *Kannada* by the interviewer. The guide  
169 was back-translated into English to ensure language consistency and validity of the  
170 questions. To assess the flow and colloquially adapt the language of the interview  
171 guide, three mock interviews were conducted by the interviewer and staff members at  
172 PHRII, who understood the local language and context where the study was conducted.  
173 During each mock interview, staff members provided feedback on the language of the  
174 questions and cultural appropriateness of the topics. Subsequent changes were  
175 incorporated following each mock interview to make the wording of questions more  
176 understandable and improve the flow of the conversation.

177 Interviews were completed either in a quiet, private room at PHRII or the  
178 participant's home. Interviews were conducted by a single interviewer (NN) who was  
179 trained in qualitative research methods and had experience conducting semi-  
180 structured, in-depth interviews. Interviews lasted for approximately 60 minutes and  
181 were audio recorded on a digital voice recorder. During the interviews, the interviewer  
182 used probes to encourage participants to share anything relevant to the topics  
183 discussed, beyond those laid out in the interview guide. The notetaker (RC) observed  
184 and documented key observations from each interview.

## 185 **Analysis**

### 186 **Quantitative**

187 All quantitative analyses and data visualizations were conducted in Microsoft  
188 Excel (2021) and RStudio (version 4.2.1; R Core Team 2021). Socioeconomic status was  
189 classified by the modified BG Prasad scale, using annual household income and family  
190 size to calculate per-capita income [26]. Individual's depressive symptoms were scored  
191 by summing the total PHQ-9 values for all 9 questions, with higher scores  
192 corresponding to increased symptomatology [24].

### 193 **Qualitative**

194 The research team debriefed each interview and discussed field notes within 48  
195 hours of completion. Interviews were transcribed verbatim and translated to English.  
196 The transcribed interviews were reviewed by the first author (NRG) to ensure  
197 transcriptions were accurate and complete. Debrief notes were correlated to the  
198 respective transcripts upon completion. Two researchers (NRG, KM) familiarized  
199 themselves with the data and generated a codebook for thematic qualitative analysis,  
200 based on the preconceived conceptual model (Fig 1). Two researchers (NRG, MB)  
201 independently coded the transcripts and debrief notes with NVivo 12 software.  
202 Interrater reliability was established with a kappa coefficient of 0.86, indicating almost  
203 complete agreement [27]. Discrepancies in coding between the investigators were  
204 resolved through consensus with a third researcher (KM). Emergent themes and

205 relevant sub-themes were then discussed among all authors to promote consistency  
206 and minimize bias. Thematic saturation was reached after analyzing data from the  
207 interviews, ensuring comprehensive coverage of the study's qualitative findings.

208

## 209 **Results**

210 Twenty participants with T2D participated in the study, of which 15 were female.  
211 Twelve participants were diagnosed with T2D within the past two years. The age of  
212 participants ranged from 21 to 35 years with a mean age of 30.8 (SD  $\pm$  4.2) All spoke  
213 Kannada as their first language. Seven were lower-middle class and six were middle  
214 class, according to the modified BG Prasad scale. Table 1 presents key health and  
215 demographic characteristics of the study participants, stratified by rural/urban  
216 distinction.

217 **Table 1. Participant sociodemographic and health behavioral characteristics**

|                                       | <b>Total (N=20)<br/>N (%)</b> | <b>Rural (N=10)<br/>N (%)</b> | <b>Urban (N=10)<br/>N (%)</b> |
|---------------------------------------|-------------------------------|-------------------------------|-------------------------------|
| <b>Age (mean <math>\pm</math> SD)</b> | 30.8 $\pm$ 4.19               | 29.2 $\pm$ 4.73               | 32.4 $\pm$ 2.99               |
| <b>T2D Duration (years)</b>           |                               |                               |                               |
| < 2                                   | 12 (60)                       | 7 (70)                        | 5 (50)                        |
| 3+                                    | 8 (40)                        | 3 (30)                        | 5 (50)                        |
| <b>Sex</b>                            |                               |                               |                               |
| Female                                | 15 (75)                       | 8 (80)                        | 7 (70)                        |
| <b>Religion</b>                       |                               |                               |                               |
| Hindu                                 | 20 (100)                      | 10 (100)                      | 10 (100)                      |
| <b>Socioeconomic Status</b>           |                               |                               |                               |
| Lower-Middle Class                    | 7 (35%)                       | 3 (30)                        | 4 (40)                        |
| Middle Class                          | 6 (30%)                       | 4 (40)                        | 2 (20)                        |
| Upper-Middle Class                    | 4 (20%)                       | 2 (20)                        | 2 (20)                        |
| Upper Class                           | 3 (15%)                       | 1 (10)                        | 2 (20)                        |

**Education Level**

|                  |        |        |        |
|------------------|--------|--------|--------|
| High School      | 5 (25) | 3 (30) | 2 (20) |
| Secondary School | 8 (75) | 7 (70) | 8 (80) |

**Marital Status**

|         |         |        |        |
|---------|---------|--------|--------|
| Married | 16 (80) | 9 (90) | 7 (70) |
| Single  | 4 (20)  | 1 (0)  | 3 (30) |

**Children**

|    |         |        |        |
|----|---------|--------|--------|
| 0  | 6 (30)  | 2 (20) | 4 (40) |
| 1  | 3 (15)  | 2 (20) | 1 (10) |
| 2+ | 11 (55) | 6 (60) | 5 (50) |

**Family History of T2D**

|         |        |        |
|---------|--------|--------|
| 15 (75) | 6 (60) | 9 (90) |
|---------|--------|--------|

**Medication<sup>a</sup>**

|                      |         |        |        |
|----------------------|---------|--------|--------|
| Oral Medication      | 17 (85) | 8 (80) | 9 (90) |
| Insulin Injections   | 2 (10)  | 0 (0)  | 2 (20) |
| No Medication        | 2 (10)  | 2 (20) | 0 (0)  |
| Ayurvedic Medication | 2 (10)  | 0 (0)  | 2 (20) |

**Frequency of Doctor Visits**

|                  |         |        |        |
|------------------|---------|--------|--------|
| 1-3 times a year | 5 (25)  | 3 (30) | 2 (20) |
| > 4 times a year | 2 (10)  | 0 (0)  | 2 (20) |
| Monthly          | 13 (65) | 7 (70) | 6 (60) |

**Doctor Training**

|                      |         |        |        |
|----------------------|---------|--------|--------|
| General Practitioner | 13 (65) | 7 (70) | 6 (60) |
| Specialist           | 7 (35)  | 3 (30) | 4 (40) |

**T2D-Related Complications<sup>b</sup>**

|        |        |        |
|--------|--------|--------|
| 5 (25) | 4 (40) | 1 (10) |
|--------|--------|--------|

**Frequency of Blood Sugar Testing**

|                              |         |        |        |
|------------------------------|---------|--------|--------|
| Only at doctor's appointment | 7 (35)  | 2 (20) | 5 (50) |
| Once a month                 | 11 (55) | 8 (80) | 3 (30) |
| Once a week                  | 2 (10)  | 0 (0)  | 2 (20) |

**Days of Physical Activity per Week**

|     |        |        |        |
|-----|--------|--------|--------|
| 0   | 9 (45) | 6 (60) | 3 (30) |
| 1-4 | 3 (15) | 2 (20) | 1 (10) |
| 5-7 | 8 (40) | 2 (20) | 6 (60) |

**Follow a Diabetic Diet**

|         |        |        |
|---------|--------|--------|
| 16 (80) | 9 (90) | 7 (70) |
|---------|--------|--------|

218 <sup>a</sup> total percentage greater than 100 because of combination treatments

219 <sup>b</sup> eye-related complications (N = 3), reproductive health complications (N = 2)

220 **Depressive symptoms**

221 Table 2 presents the results of the PHQ-9 screening for the participants. While a  
 222 small sample size, rates of symptoms were high. Of the 20 participants, over half (55%,  
 223 N = 11) of the study participants had scores in the mild depression range, 15% (N = 3) in

224 the moderate to moderately severe depression range. Five participants reported having  
225 suicidal thoughts in the past 2 weeks -- 3 with scores in the mild depression range and  
226 2 in the moderately severe depression range. The highest scores were associated with  
227 the following 3 prompts: 1) Little interest or pleasure in doing things; 2) Feeling down,  
228 depressed, or hopeless; and 3) Feeling tired or having little energy.

229 **Table 2. Depression severity (PHQ-9)**

| Depression Severity              | N (%)   |
|----------------------------------|---------|
| Minimal                          | 6 (30)  |
| Mild                             | 11 (55) |
| Moderate / Moderately Severe     | 3 (15)  |
| Suicidal Ideation (Past 2 Weeks) | 5 (25)  |

230  
231 Fig 2 visually presents the relationships between covariates and depressive  
232 symptoms. Participants who identified as female, resided in rural Mysore district, and  
233 belonged to a lower socioeconomic status were more likely to have depressive  
234 symptoms. Participants who were diagnosed with T2D within 2 years, did not have a  
235 family history of T2D, faced T2D-related complications, adhered to a diabetic diet, and  
236 neglected physical activity in their routine were also more prone to depressive  
237 symptoms.

238 **Fig 2. Association of covariates with depressive symptoms**

## 239 **Intermediary determinants of diabetes self-management**

### 240 **Health literacy**

241 When asked how many people in their community have diabetes, participants  
242 predicted an average of 70% (SD 16.8%), indicating the seemingly high prevalence. In  
243 2021, the prevalence of diabetes in India was reported at 9.6%, drastically different  
244 from the participants' perception [2]. Participants across rural and urban Mysore  
245 district showed varied levels of awareness about the prevalence of diabetes in younger  
246 populations. In rural Mysore district, 90% of participants stated that they did not know  
247 other people their age living with the condition:

248 *“People with very young age will not be affected by diabetes... I think I am*  
249 *exceptional.”* (P10, Female, PHQ-9 = 6, Mild Depression)

250 However, in urban Mysore district, participants reported greater awareness about the  
251 rising prevalence of diabetes at younger ages:

252 *“Now almost everyone is becoming diabetic at a younger age. If the parents have it,*  
253 *the kids might acquire it too, and with that, the food we consume is also not good.*

254 *So, from that as well, people are getting sugar [diabetes] soon.”* (P15, Female, PHQ-  
255 9 = 6, Mild Depression)

256 Overall, participants reported having a lack of trustworthy sources to learn about  
257 diabetes. As a result, 7 (35%) felt scared to ask questions to better understand their  
258 biological condition, due to false information or societal stigma:

259           *“Few of them will say that food may also cause diabetes, but few say that it is not*  
260           *because of food. I don’t know whom I should listen and follow.”* (P10, Female, PHQ-  
261           9 = 6, Mild Depression)

262           Participants reported that their healthcare providers recommended them to  
263           maintain a diabetic diet, perform physical activity regularly, and to avoid stress to  
264           manage their condition. However, due to the large quantity of patients in the clinic,  
265           participants rarely experienced individualized care. One participant stated:

266           *“My doctor won’t specifically mention everything, they will just say to have proper*  
267           *food intake and be calm without worrying about anything. Sometimes I feel bad that*  
268           *they will not tell me properly about diabetes.”* (P9, Female, PHQ-9 = 15, Moderately  
269           Severe Depression)

270           All of the participants knew that diabetes-related complications exist, but the majority  
271           (65%) were not adequately informed about the complications and ways to prevent  
272           them:

273           *“They [doctors] said that if there is a wound in the leg, they will amputate it and*  
274           *there will be loss of vision. If there is a wound in the hand, they will amputate it.”*  
275           (P11, Female, PHQ-9 = 9, Mild Depression)

276           Nearly all participants (90%) explicitly stated that they do not want to take medication  
277           for the rest of their lives. These perceptions are influenced by participants’ community  
278           members and even healthcare professionals.



279            *“They have said to control diabetes by taking proper food and stopping the tablets.*  
280            *Even our family doctor suggested I should stop taking tablets and not develop a habit*  
281            *of taking them forever.”* (P13, Male, PHQ-9 = 0, Minimal Depression)

282            Twelve participants (60%) used language about “addiction” when referring to  
283            their diabetes medication, claiming that they do not want to become addicted to the  
284            tablets:

285            *“If I get addicted to tablets, it will be difficult. I want to control it [diabetes] in food.*  
286            *So, I am not taking any tablets.”* (P11, Female, PHQ-9 = 9, Mild Depression)

## 287    **Access**

288            In rural Mysore district, participants reported constant crowds at the  
289            government hospitals, requiring patients to enter a queue just to meet with the doctor.  
290            This comes alongside various challenges – women must consider who will accompany  
291            them to their appointments, working professionals must request leave from their jobs  
292            in advance, and all must find transportation to and from the clinic. One participant  
293            described her challenges with seeing a healthcare provider:

294            *“Sometimes doctors will not be there. One day I waited for so many hours but the*  
295            *doctor did not come to the hospital. So I came back home, if he is not there I will go*  
296            *the next day.”* (P10, Female, PHQ-9 = 6, Mild Depression)

297            Seven participants (35%) stated that they prefer getting their healthcare at  
298            private clinics because they believe that if they are paying for it, the service must be

299 better: *“I feel that whatever the money I spend, my health should be fine and good. So I will*  
300 *be happy.”* (P2, Female, PHQ-9 = 15, Moderately Severe Depression).

301 With a greater presence of healthcare facilities, there are more opportunities to  
302 meet with a doctor in urban Mysore district. Some doctors in the urban region even  
303 adjust their hours to be available after the workday. However, participants reported  
304 that crowds are still present at the clinics. Due to the crowds and long queues, some  
305 patients reported feeling like a burden if they take too much time with the doctor,  
306 which interferes with their own care. Some participants described:

307 *“There will be so many patients like me, if I take too much time to discuss my*  
308 *problems, it will get very late for other patients. I will be troubling them. So I will*  
309 *think that I can talk to him the next time when I go for a checkup.”* (P12, Female,  
310 PHQ-9 = 7, Mild Depression)

311 Blame from healthcare providers emerged as a theme, illustrating some of the  
312 complicated and diverse power dynamics between patients and their providers. Over  
313 half of participants in urban Mysore district reported that they experienced blame from  
314 their providers if their diabetes was not under control.

315 *“She [doctor] actually scolds me to take proper care of my health. She also*  
316 *mentioned that due to my negligence I am unable to take proper care of my health. If*  
317 *I don’t start taking care of it she has warned me to not visit the clinic.”* (P20,  
318 Female, PHQ-9 = 7, Mild Depression)

319           Despite these challenges, some patients are willing to invest the time to take  
320 care of their health. They navigate the difficulty with positive attitudes:

321           *“If we want to get the medicines we should wait, it’s not like they should only treat*  
322 *me, there will be so many people like me. Even they will have some problem, we can’t*  
323 *say that our time is getting wasted and blame doctors. If we are unable to contact*  
324 *him today, we can visit the next day.”* (P6, Male, PHQ-9 = 0, Minimal Depression)

### 325 **Financial burden**

326           Due to competing financial priorities, most participants (65%) are unable to  
327 afford their diabetes medication. All of the participants with children mentioned that  
328 they did not want their diabetes to interfere with their children’s education:

329           *“I cannot spend my wages on my tablets. I have to take care of my children’s*  
330 *education.”* (P18, Female, PHQ-9 = 6, Mild Depression).

331           Some participants reported skipping doses if they do not have the means to  
332 purchase it, and others choose to not spend their limited expendable income on their  
333 medications. One participant reported that she preferred government-subsidized  
334 medications, but they are not available in her area. Three participants reported that  
335 they try to maximize their limited supplies of medication by using it as a reactive  
336 mechanism, rather than a preventative mechanism. They explained that they wait to  
337 take the medication until they experience symptoms of high blood sugar levels:

338            *“When I get the burning sensation in my feet, I come to know that my sugar level is*  
339            *high. Then, I take one tablet and gulp it. That is all.”* (P11, Female, PHQ-9 = 9, Mild  
340            Depression)

341            Under financial constraints, people living with diabetes find themselves having  
342            to choose between speaking to their doctor or purchasing their medication due to the  
343            costs involved. In these scenarios, they are managing their condition blindly, until they  
344            can visit their doctor again.

345            *“I will not go for a blood test every month because of financial problems. I will visit*  
346            *the private hospital so the cost will be more, so I will just purchase tablets.”* (P9,  
347            Female, PHQ-9 = 15, Moderately Severe Depression)

348            For some, their diabetes is still poorly controlled, so they questioned the purpose  
349            of spending their money:

350            *“I purchase the tablets and I give the amount for appointments. Even though I spend*  
351            *so much, my [blood] sugar will not get reduced. I am fed up with it.”* (P5, Female,  
352            PHQ-9 = 13, Moderate Depression)

### 353    **Social factors**

354            During the interviews, all of the participants described encounters with people  
355            who believed that diabetes was communicable, both in the rural and urban regions.  
356            This misconception was so well-established in certain communities that 5 (25%)

357 participants reported never seeing their neighbors again after they shared their  
358 diagnosis.

359 *“Once I was going out to the hospital and my neighbor asked what the problem was.*  
360 *I said I have diabetes. They thought it was contagious because I have got diabetes at*  
361 *an early age. They decided not to have any contact with us after that.”* (P8, Female,  
362 PHQ-9 = 9, Mild Depression)

363 All of the participants reported experiences of teasing from community members  
364 for having diabetes at a young age. Despite its ubiquity, it is still a taboo topic. The  
365 young adults described feeling embarrassed to share their diagnosis because others talk  
366 and laugh about them, even if they *“pretend to act like they care”* (P1, Female, PHQ-9 =  
367 9, Mild Depression):

368 *“I do feel embarrassed to share. People who stay in the village will tease me, saying*  
369 *that at an early age I have got diabetes. Some will understand, but not all will get to*  
370 *know our problems.”* (P4, Female, PHQ-9 = 1, Minimal Depression)

371 Fear of this community gossip and stigma often deterred participants from going  
372 to public health camps or visiting the community health workers, out of fear that  
373 someone would *“watch and talk behind [her] back to the neighbors”* (P10, Female, PHQ-9  
374 = 6, Mild Depression).

375 *“The ASHA (Accredited Social Health Activist) workers ask me to get the sugar*  
376 *tested in camps, but I do not go and I do not like to go. When I have to go for a*

377 *checkup, I just tell others that I am going out. I will never disclose about sugar*  
378 *[diabetes] checkup because I do not like to say it. The way they look at us is different.*  
379 *So, I do not wish to disclose. That is sad.” (P18, Female, PHQ-9 = 6, Mild*  
380 *Depression)*

381 Due to the prevalent social stigma, the 3 unmarried participants described their  
382 fear of not finding a partner because of their diagnosis with diabetes. One married  
383 participant shared that she did not inform her partner of her diagnosis until after the  
384 wedding ceremony was complete, out of fear that his family would no longer approve of  
385 the union.

### 386 **Barriers to diabetes self-management**

387 Sixteen participants (80%) self-reported following a diabetic diet, different from  
388 the rest of their family members, increasing the burden on whoever is cooking the food.  
389 Many participants spoke about how they would rather eat the same food as everyone  
390 else than burden others. Some discussed the concept of portion control, while others  
391 just eat the same to fit in.

392 *“When we are all together, I can’t ask for separate food. I should have what all*  
393 *others are having.” (P3, Female, PHQ-9 = 0, Minimal Depression)*

394 Two participants (10%) described forgoing their recommended diabetic diet due  
395 to fear of what others would think about them. If they were to change their lunches at

396 their workplace, they were afraid that their condition would be revealed to their  
397 employer and coworkers:

398 *“I will have breakfast early in the morning. But for my workplace, I will carry rice.*

399 *They will think I am someone special if I don’t, so I have to carry rice for lunch.”* (P3,

400 Female, PHQ-9 = 0, Minimal Depression)

401 Some female participants do not feel comfortable going for a walk or performing  
402 physical activity in public by themselves, especially at night. Then, they are reliant on  
403 their husbands to accompany them on their walks.

404 *“In the evening it will be late and it becomes dark, so I will not go alone.”* (P1,

405 Female, PHQ-9 = 9, Mild Depression)

#### 406 **Importance of positive social support**

407 The presence of familial support is known to be an important factor in diabetes  
408 management and quality of life. Some female participants reported encouraging  
409 support from their husbands to visit the hospital and reduce stress:

410 *“My husband will say that no matter how much money or time we spend, I should be*

411 *healthy without any problems. He is even ready to take me to the other hospital. He*

412 *is not worried about money.”* (P10, Female, PHQ-9 = 6, Mild Depression)

413 One participant described her close relationship with a friend who also has T2D.

414 Her friend was successfully managing her glycemic control and served as an inspiration

415 and motivation for her to take care of her own health.

416 *“One of my friends has got diagnosed with diabetes. She is having regular spouts in*  
417 *her daily food routine and she is doing some exercise, going for a walk to maintain*  
418 *her health. I feel if I do the same I may also have a proper control in sugar level and*  
419 *can be healthy.”* (P10, Female, PHQ-9 = 6, Mild Depression)

## 420 **Psychological factors**

421 Feelings of sadness and depressive symptoms after diagnosis with diabetes was  
422 common amongst study participants. Most participants (75%) described a sentiment of  
423 “why me?” and “what else could happen to me?”

424 *“I felt sad and worried about the occurrence of diabetes at this young age, and also*  
425 *felt sad that I cannot eat most of the things which I like.”* (P1, Female, PHQ-9 = 9,  
426 Mild Depression)

427 Some participants relate their overall happiness to their diabetes diagnosis and  
428 glycemic control, resulting in a lack of individual control over their general well-being.

429 *“If the sugar level is high, I will be very tensed. If it’s normal, I will be happy and*  
430 *calm.”* (P10, Female, PHQ-9 = 6, Mild Depression)

431 A feeling of worry due to living with diabetes at a young age was common across  
432 the study participants. This ranges from impeding routine activities, not being able to  
433 manage their glycemic control, and troubling others in their family.

434 *“I got it from my mom, and I don’t want it to happen to my kids because of me. I have*  
435 *two daughters. What if they have problems when they get married and have*



436 *complications during their pregnancies? Now, people are getting diabetic during*  
437 *their pregnancy. I had two kids and after that I got diabetes, but people in the*  
438 *present generation are getting diabetes during pregnancy. I am afraid about that.”*

439 (P15, Female, PHQ-9 = 6, Mild Depression)

440 All but one participant expressed fear about future complications and early  
441 death due to poorly controlled diabetes:

442 *“I feel that I may die early, I will be worried that there will be no one to take care of*  
443 *my daughter. They also say that there will be more consequences like kidney stone,*  
444 *heart disease, and also some may lose their eyesight. So I am worried about all of*  
445 *these.”* (P8, Female, PHQ-9 = 9, Mild Depression)

446 This fear of complications and death sometimes translates to a fear of going to  
447 the doctor and addressing concerns about their own health.

448 *“I feel scared to discuss with them, I feel they might say something new. Now I am*  
449 *already suffering from a lot, I don’t want to suffer even more.”* (P9, Female, PHQ-9 =  
450 15, Moderately-Severe Depression)

451 Many participants expressed sentiments of feeling like a burden to their family  
452 members:

453 *“I definitely feel that I am becoming a trouble to someone. I also feel I should not*  
454 *depend on anyone, neither my husband nor son. I should take care of myself.”* (P12,  
455 Female, PHQ-9 = 7, Mild Depression)

456 For some, this feeling had built over time to suicidal thoughts.

457 *“I feel that why should I live, all are facing problems because of me. No one will take*  
458 *care of me except my husband. So I feel I shouldn’t be here, why should everyone*  
459 *suffer because of me?” (P8, Female, PHQ-9 = 9, Mild Depression)*

460 Participants reported a significant impact to their energy levels and working  
461 capacity since their diagnosis with diabetes:

462 *“I am not able to work as much as others, I get stressed quickly. I feel fatigued. I have*  
463 *to take tablets on time, and after taking them, I feel really fatigued. If I happen to*  
464 *take the tablets half an hour later because of some chores around the house, I will*  
465 *feel really fatigued. I feel like eating immediately. I am not able to walk like others.*  
466 *People who are my age and don’t have any sugar [diabetes], they can walk well. I do*  
467 *not have as much strength as them.” (P15, Female, PHQ-9 = 6, Mild Depression)*

468

## 469 **Discussion**

470 With the rising prevalence of T2D in younger populations, it is critical to  
471 understand their lived experiences and identify barriers to their effective diabetes  
472 management and overall well-being. This study concurrently explores the occurrence  
473 of depressive symptoms with the lived experiences, facilitators, and barriers to T2D-  
474 related self-care activities in young adults under the age of 35 in Mysore district, South  
475 India. Overall, participants exhibited high rates of depressive symptoms and suicidal

476 ideation. Key barriers and facilitators to diabetes self-management and overall quality  
477 of life include knowledge and awareness about the condition, experiences with and in  
478 the healthcare system, presence of depressive symptoms, and physical and external  
479 manifestations and impact of the condition on other aspects of their lives.

480 All study participants described challenging circumstances in their daily lives  
481 with the condition, regardless of their PHQ-9 score. Negative feelings towards the  
482 condition, feeling like a burden, and worry about the future were sentiments expressed  
483 by participants at all levels of depression symptoms. In this study, 14 participants  
484 (70%) presented mild to moderately-severe depressive symptoms, with 5 participants  
485 (25%) reporting recent suicidal thoughts. Compared to the national prevalence  
486 estimate of 3.6% in India, young adults with T2D are at a greater risk of depressive  
487 disorders [28]. Descriptively in this sample, depressive symptoms are associated with  
488 sex, region, socioeconomic status, duration since T2D diagnosis, family history of T2D,  
489 T2D-related complications, adherence to a diabetic diet, and physical activity. This  
490 data is consistent with the established relationship between diabetes and depressive  
491 symptoms recognized around the world as well as factors shown to be associated with  
492 this relationship [7,8,10–14]. All people living with diabetes must manage the constant,  
493 daily effects associated with the condition. Chronic illnesses are challenging for  
494 everyone living with them, both physically and mentally, and it is important that both  
495 are treated concurrently to improve overall health [12].

496           The interviews revealed several knowledge gaps and misconceptions related to  
497 diabetes. Many participants lacked trustworthy sources of information about the  
498 condition and were afraid to ask questions due to the stigma associated with it. The  
499 belief that diabetes is communicable was particularly prevalent and concerning,  
500 leading to experiences of social isolation and discrimination. Researchers in the United  
501 States and Ghana have established that lower health literacy coupled with illness  
502 perception is associated with lower self-management behaviors in adults living with  
503 T2D [28–30]. Medication perception also played a significant role in participants’  
504 experience with T2D. Most participants expressed reluctance to rely on medication for  
505 the rest of their lives, influenced by both healthcare professionals and community  
506 members. Similar results were found by Miglani et al. in India (2000), where young  
507 adults living with diabetes reported fear that people would treat them differently and  
508 experienced unsolicited advice and instructions about household remedies from family  
509 members and peers [17]. Researchers in Saudi Arabia and Japan have found that  
510 medication adherence is dependent on the beliefs toward the medications and  
511 potential T2D complications [31,32]. This speaks to the urgency of implementing public  
512 health campaigns to dispel myths circulating within local communities and provide  
513 accurate information about T2D, including the importance of medication adherence for  
514 long-term glycemic control and prevention of future complications. Adults with T2D  
515 are more likely to form positive perceptions about T2D with increased health literacy,

516 encouraging self-care practices for glycemic control, eliminating cultural, social, and  
517 personal convictions about the condition, and building patient compliance and self-  
518 efficacy [33].

519         The healthcare system plays a pivotal role in T2D management. Participants  
520 reported mixed interactions with healthcare providers; while they generally  
521 recommended lifestyle modifications, including diet and exercise, individualized care  
522 and evidence-based support was often lacking. In some cases, participants experienced  
523 blame and scolding by their healthcare providers, which is shown to have detrimental  
524 effects on patient motivation and self-efficacy [34,35]. Complex power dynamics  
525 between patients and providers exist in both urban and rural Mysore district. A  
526 qualitative study conducted in rural Australia found that power dynamics and trust  
527 between healthcare providers and patients greatly influence patient experiences and  
528 perceived care [36]. Furthermore, rural participants' preference for private clinics  
529 underscores the need for improved accessibility and quality of public healthcare  
530 services. Similar findings were established in Vietnam, where researchers found that  
531 social factors including word-of-mouth, relationships with healthcare providers,  
532 healthcare staff attitudes, and marketing influence the choice of private over public  
533 services [37].

534         Self-care activities are essential components of diabetes management, but  
535 participants expressed numerous barriers that they experience. Physical activity was

536 hindered by fatigue, concerns about social judgment, and a lack of time. Healthy diets  
537 were limited by financial constraints and family priorities, as female participants  
538 expressed difficulties in maintaining separate diets from their family members.  
539 Medication adherence was also influenced by financial constraints, as some  
540 participants had to choose between purchasing their medication or investing in  
541 something else. Previous research amongst Asian young adults in China and Singapore  
542 recognized that adherence to diabetes medication is poorer in younger adults than in  
543 older adults [28]. Researchers found similar results in urban slums in South India,  
544 where the overall prevalence of self-care activities was low, indicating a need for more  
545 awareness and education about diabetes self-care management [38]. South Asian  
546 populations with T2D have been shown to experience these barriers to self-care  
547 activities, including communication discordance, lack of knowledge and  
548 misperceptions about the condition and management, gender-specific roles, lack of  
549 family support and cultural appropriateness [39]. Addressing these barriers requires a  
550 multifaceted approach, including community support, increased awareness, and access  
551 to safe physical activity opportunities, healthy foods, and affordable medications.

552         The presence or lack of social support played a critical role in the participants'  
553 diabetes management. Supportive spouses and friends provided encouragement and  
554 motivation to some participants, emphasizing the importance of involving peers in  
555 diabetes care. Social and family support has been shown to improve motivation, self-

556 efficacy, and health outcomes in people living with T2D around the world [35,40,41].  
557 However, competing priorities, particularly related to children’s education, often took  
558 precedence over self-care. Previous research has shown that occupation, living  
559 condition, comorbidity, current treatment, and history of hospitalization are also  
560 predictors of perceived family burden of T2D [42]. It is important that young adults  
561 with T2D feel empowered to prioritize their health, without feeling like a burden to  
562 their families; increased social support amongst this rising population has the potential  
563 to build community and foster solidarity to improve both physical and mental health  
564 outcomes.

## 565 **Strengths and limitations**

566 A major strength of this study is the collaboration with local researchers in  
567 Mysore district, who had existing trust and relationships within the community. All  
568 interviews were conducted by one research assistant to maintain internal validity and  
569 consistency across the interviews. Qualitative analysis was conducted by three  
570 researchers; one participated in the interviews to account for contextual cues and the  
571 other two were not present, minimizing bias and allowing for objectivity in the  
572 outcomes. The local researchers were consulted closely to ensure adequate  
573 representation of the local context in the presented qualitative and quantitative  
574 findings.

575           Thematic saturation was reached with the sample of qualitative interviews, but  
576 it was too small for robust quantitative analysis. There is inherent selection bias in who  
577 chose to participate in the study, which may have positively skewed the results.  
578 Additionally, there is gender asymmetry in the study participants; while we planned to  
579 recruit an equal number of male and female T2D patients, more females volunteered  
580 for the study. Some results may be biased by participants' perceptions of health  
581 research, but we employed probing to minimize this bias as much as possible. Causal  
582 inferences cannot be drawn, given the study's cross-sectional design. However, the  
583 purpose of this study was not for generalizability, but rather an in-depth exploration of  
584 lived experiences with T2D in Mysore district.

## 585 **Future directions**

586           Future research should consider larger and more diverse samples, from both  
587 urban and rural Mysore district. Longitudinal studies could provide insights into how  
588 young adults' experiences and perceptions of diabetes change over time. Additionally,  
589 interventions tailored to address the identified barriers to self-care activities and  
590 psychosocial well-being should be developed and evaluated for their effectiveness in  
591 improving T2D management and overall quality of life in young adult populations.

592



## 593 **Conclusion**

594           The findings of this study highlight the multifaceted challenges faced by young  
595 adults living with T2D in Mysore district, South India. Addressing these challenges  
596 requires a holistic approach, including improved healthcare access, education and  
597 awareness campaigns, mental health support, and interventions to overcome barriers  
598 to self-care practices. As T2D becomes more prevalent across the world at younger  
599 ages, it is imperative that we understand their lived experiences to best support them.  
600 Young adulthood is an excellent opportunity to intervene and promote healthy  
601 behaviors before life-changing complications occur. By understanding the unique  
602 experiences and perceptions of young adults with T2D, healthcare systems and  
603 policymakers can develop more effective strategies to support diabetes management  
604 and improve the long-term well-being of those affected.

605

606 **Funding:** This project was funded by the Paul Farmer Global Health Fieldwork Grant (Duke  
607 Global Health Institute), Janet B. Chiang Grant (Duke University Asian/Pacific Studies  
608 Institute), Human Rights Summer Research Grant (Duke Human Rights Center at the Franklin  
609 Humanities Institute), Undergraduate Summer Award (Duke University Center for International  
610 & Global Studies), and Undergraduate Research Support Independent Study Grant (Duke  
611 University Undergraduate Research Support Office). The funders had no role in study design,  
612 data collection and analysis, decision to publish, or preparation of the manuscript.

613 **Competing Interests:** The authors declare no competing interests.

## 614 References

- 615 1. IDF Diabetes Atlas | Tenth Edition [Internet]. 2022 [cited 2022 Jan 17]. Available from:  
616 <https://diabetesatlas.org/>
- 617 2. India diabetes report 2000 – 2045 [Internet]. [cited 2024 Jan 15]. Available from:  
618 <https://www.diabetesatlas.org/data/>
- 619 3. Ghorpade A, Majgi S, Sarkar S, Kar S, Roy G, Ananthanarayanan P, et al. Diabetes in rural  
620 Pondicherry, India: a population-based study of the incidence and risk factors. *WHO*  
621 *South-East Asia J Public Health*. 2013;2(3):149.
- 622 4. Gurunathan U, Prasad HK, White S, Sangalalingam T, Krishnamoorthy N. Type 2 Diabetes  
623 Mellitus in Adolescents From Southern India – A Single Center Experience. *Indian*  
624 *Pediatr*. 2021;58(2):176–7.
- 625 5. Karthik RC, Jagadeesh S. Self-care practices among type II diabetics in rural area of  
626 Kancheepuram district, Tamil Nadu. *J Fam Med Prim Care*. 2020;9(6):7.
- 627 6. Unnikrishnan R, Anjana RM, Mohan V. Diabetes mellitus and its complications in India.  
628 *Nat Rev Endocrinol*. 2016 Jun;12(6):357–70.
- 629 7. Johnson LCM, Desloge A, Sathish T, Williams ED, Absetz P, Haregu T, et al. The  
630 relationship between common mental disorders and incident diabetes among participants  
631 in the Kerala Diabetes Prevention Program (K-DPP). *PLoS ONE*. 2021 Jul  
632 23;16(7):e0255217.
- 633 8. Mukherjee N, Chaturvedi SK. Depressive symptoms and disorders in type 2 diabetes  
634 mellitus. *Curr Opin Psychiatry*. 2019 Sep;32(5):416–21.
- 635 9. Weaver LJ, Mendenhall E. Applying Syndemics and Chronicity: Interpretations from  
636 Studies of Poverty, Depression, and Diabetes. *Med Anthropol*. 2014 Mar 1;33(2):92–108.
- 637 10. Mendenhall E, Norris SA, Shidhaye R, Prabhakaran D. Depression and Type 2 Diabetes in  
638 Low and Middle Income Countries: A Systematic Review. *Diabetes Res Clin Pract*. 2014  
639 Feb;103(2):276–85.
- 640 11. Chaturvedi SK, Manche Gowda S, Ahmed HU, Alosaimi FD, Andreone N, Bobrov A, et al.  
641 More anxious than depressed: prevalence and correlates in a 15-nation study of anxiety  
642 disorders in people with type 2 diabetes mellitus. *Gen Psychiatry*. 2019 Aug  
643 9;32(4):e100076.
- 644 12. Lloyd CE, Nouwen A, Sartorius N, Ahmed HU, Alvarez A, Bahendeka S, et al. Prevalence  
645 and correlates of depressive disorders in people with Type 2 diabetes: results from the  
646 International Prevalence and Treatment of Diabetes and Depression (INTERPRET-DD)  
647 study, a collaborative study carried out in 14 countries. *Diabet Med*. 2018;35(6):760–9.
- 648 13. Mathew M, Abish A, Kuriakose A, Isaiah JR, A m K, K V. Predictors of depression among  
649 patients with diabetes mellitus in Southern India. *Asian J Psychiatry*. 2013 Aug  
650 1;6(4):313–7.
- 651 14. Mendenhall E, Shivashankar R, Tandon N, Ali MK, Narayan KMV, Prabhakaran D. Stress  
652 and Diabetes in Socioeconomic Context: A Qualitative Study of Urban Indians. *Soc Sci*  
653 *Med* 1982. 2012 Dec;75(12):2522–9.
- 654 15. Thomas L, Asha H, Amalraj R, Prakash R, Abraham P, Thomas N. The utility of Problem  
655 Areas in Diabetes (PAID) scale amongst patients with Type 2 diabetes (T2DM): An  
656 experience from a teaching hospital in southern India. *J Fam Med Prim Care*.

- 657 2021;10(4):1687.
- 658 16. Shobhana R, Rama Rao P, Lavanya A, Padma C, Vijay V, Ramachandran A. Quality of life  
659 and diabetes integration among subjects with type 2 diabetes. *J Assoc Physicians India*.  
660 2003 Apr;51:363–5.
- 661 17. Miglani S, Sood A, Shah P. Self reported attitude and behavior of young diabetics about  
662 discussing their disease. *Diabetes Res Clin Pract*. 2000 Apr 1;48(1):9–13.
- 663 18. Kalra B, Kalra S, Kumar A. Social stigma and discrimination: A care crisis for young  
664 women with diabetes in India. *Diabetes Voice*. 2009;54(special issue):37–9.
- 665 19. World Health Organization. A conceptual framework for action on the social determinants  
666 of health [Internet]. World Health Organization; 2010 [cited 2024 Jan 15]. Available from:  
667 <https://iris.who.int/handle/10665/44489>
- 668 20. Habtewold TD, Islam MdA, Radie YT, Tegegne BS. Comorbidity of depression and  
669 diabetes: an application of biopsychosocial model. *Int J Ment Health Syst*. 2016 Dec  
670 3;10(1):74.
- 671 21. Designing and Conducting Mixed Methods Research [Internet]. SAGE Publications Inc.  
672 2011 [cited 2024 Jan 15]. Available from: [https://us.sagepub.com/en-us/nam/designing-](https://us.sagepub.com/en-us/nam/designing-and-conducting-mixed-methods-research/book241842)  
673 [and-conducting-mixed-methods-research/book241842](https://us.sagepub.com/en-us/nam/designing-and-conducting-mixed-methods-research/book241842)
- 674 22. Census India [Internet]. [cited 2024 Jan 15]. Available from:  
675 <https://censusindia.gov.in/census.website/>
- 676 23. National Family Health Survey [Internet]. [cited 2024 Jan 15]. Available from:  
677 <https://rchiips.org/nfhs/about.shtml>
- 678 24. Kroenke K, Spitzer RL, Williams JB. The PHQ-9: validity of a brief depression severity  
679 measure. *J Gen Intern Med*. 2001 Sep;16(9):606–13.
- 680 25. De Man J, Absetz P, Sathish T, Desloge A, Haregu T, Oldenburg B, et al. Are the PHQ-9 and  
681 GAD-7 Suitable for Use in India? A Psychometric Analysis. *Front Psychol*. 2021 May  
682 13;12:676398.
- 683 26. Pentapati SSK, Debnath DJ. Updated BG Prasad’s classification for the year 2022. *J Fam  
684 Med Prim Care*. 2023 Jan;12(1):189–90.
- 685 27. McHugh ML. Interrater reliability: the kappa statistic. *Biochem Medica*. 2012 Oct  
686 15;22(3):276–82.
- 687 28. Alharbi S, Alhofaian A, Alaamri MM. Illness Perception and Medication Adherence among  
688 Adult Patients with Type 2 Diabetes Mellitus: A Scoping Review. *Clin Pract*. 2023 Jan  
689 3;13(1):71–83.
- 690 29. Kugbey N, Oppong Asante K, Adulai K. Illness perception, diabetes knowledge and self-  
691 care practices among type-2 diabetes patients: a cross-sectional study. *BMC Res Notes*.  
692 2017 Aug 10;10(1):381.
- 693 30. Ajuwon AM, Insel K. Health literacy, illness perception, depression, and self-management  
694 among African Americans with type 2 diabetes. *J Am Assoc Nurse Pract*. 2022 Sep  
695 1;34(9):1066–74.
- 696 31. Alatawi YM, Kavookjian J, Ekong G, Alrayees MM. The association between health beliefs  
697 and medication adherence among patients with type 2 diabetes. *Res Soc Adm Pharm  
698 RSAP*. 2016;12(6):914–25.
- 699 32. Hashimoto K, Urata K, Yoshida A, Horiuchi R, Yamaaki N, Yagi K, et al. The relationship  
700 between patients’ perception of type 2 diabetes and medication adherence: a cross-

- 701 sectional study in Japan. *J Pharm Health Care Sci.* 2019;5:2.
- 702 33. Lee YJ, Shin SJ, Wang RH, Lin KD, Lee YL, Wang YH. Pathways of empowerment  
703 perceptions, health literacy, self-efficacy, and self-care behaviors to glycemic control in  
704 patients with type 2 diabetes mellitus. *Patient Educ Couns.* 2016 Feb;99(2):287–94.
- 705 34. Freeman-Hildreth Y, Aron D, Cola PA, Wang Y. Coping with diabetes: Provider attributes  
706 that influence type 2 diabetes adherence. *PloS One.* 2019;14(4):e0214713.
- 707 35. Nam S, Chesla C, Stotts NA, Kroon L, Janson SL. Barriers to diabetes management: patient  
708 and provider factors. *Diabetes Res Clin Pract.* 2011 Jul;93(1):1–9.
- 709 36. McDonald J, Jayasuriya R, Harris MF. The influence of power dynamics and trust on  
710 multidisciplinary collaboration: a qualitative case study of type 2 diabetes mellitus. *BMC*  
711 *Health Serv Res.* 2012 Mar 13;12:63.
- 712 37. Al-Balushi S, Khan FR. Factors Influencing the Preference of Private Hospitals to Public  
713 Hospitals in Oman [Internet]. Rochester, NY; 2017 [cited 2024 Jan 15]. Available from:  
714 <https://papers.ssrn.com/abstract=3065470>
- 715 38. Chandrika K, Das B, Syed S, Challa S. Diabetes self-care activities: A community-based  
716 survey in an urban slum in Hyderabad, India. *Indian J Community Med.* 2020;45(3):307.
- 717 39. Sohal T, Sohal P, King-Shier KM, Khan NA. Barriers and Facilitators for Type-2 Diabetes  
718 Management in South Asians: A Systematic Review. *PloS One.* 2015;10(9):e0136202.
- 719 40. Al-Dwaikat TN, Rababah JA, Al-Hammouri MM, Chlebowy DO. Social Support, Self-  
720 Efficacy, and Psychological Wellbeing of Adults with Type 2 Diabetes. *West J Nurs Res.*  
721 2021 Apr;43(4):288–97.
- 722 41. Pesantes MA, Del Valle A, Diez-Canseco F, Bernabé-Ortiz A, Portocarrero J, Trujillo A, et  
723 al. Family Support and Diabetes: Patient’s Experiences From a Public Hospital in Peru.  
724 *Qual Health Res.* 2018 Oct;28(12):1871–82.
- 725 42. Molla IB, Berhie MA, Debele KA, Germossa GN, Hailu FB. Persons with Diabetes’  
726 Perceptions of Family Burden and Associated Factors. *J Diabetes Res* [Internet]. 2023  
727 [cited 2024 Jan 15];2023. Available from:  
728 <https://www.ncbi.nlm.nih.gov/pmc/articles/PMC9836787/>

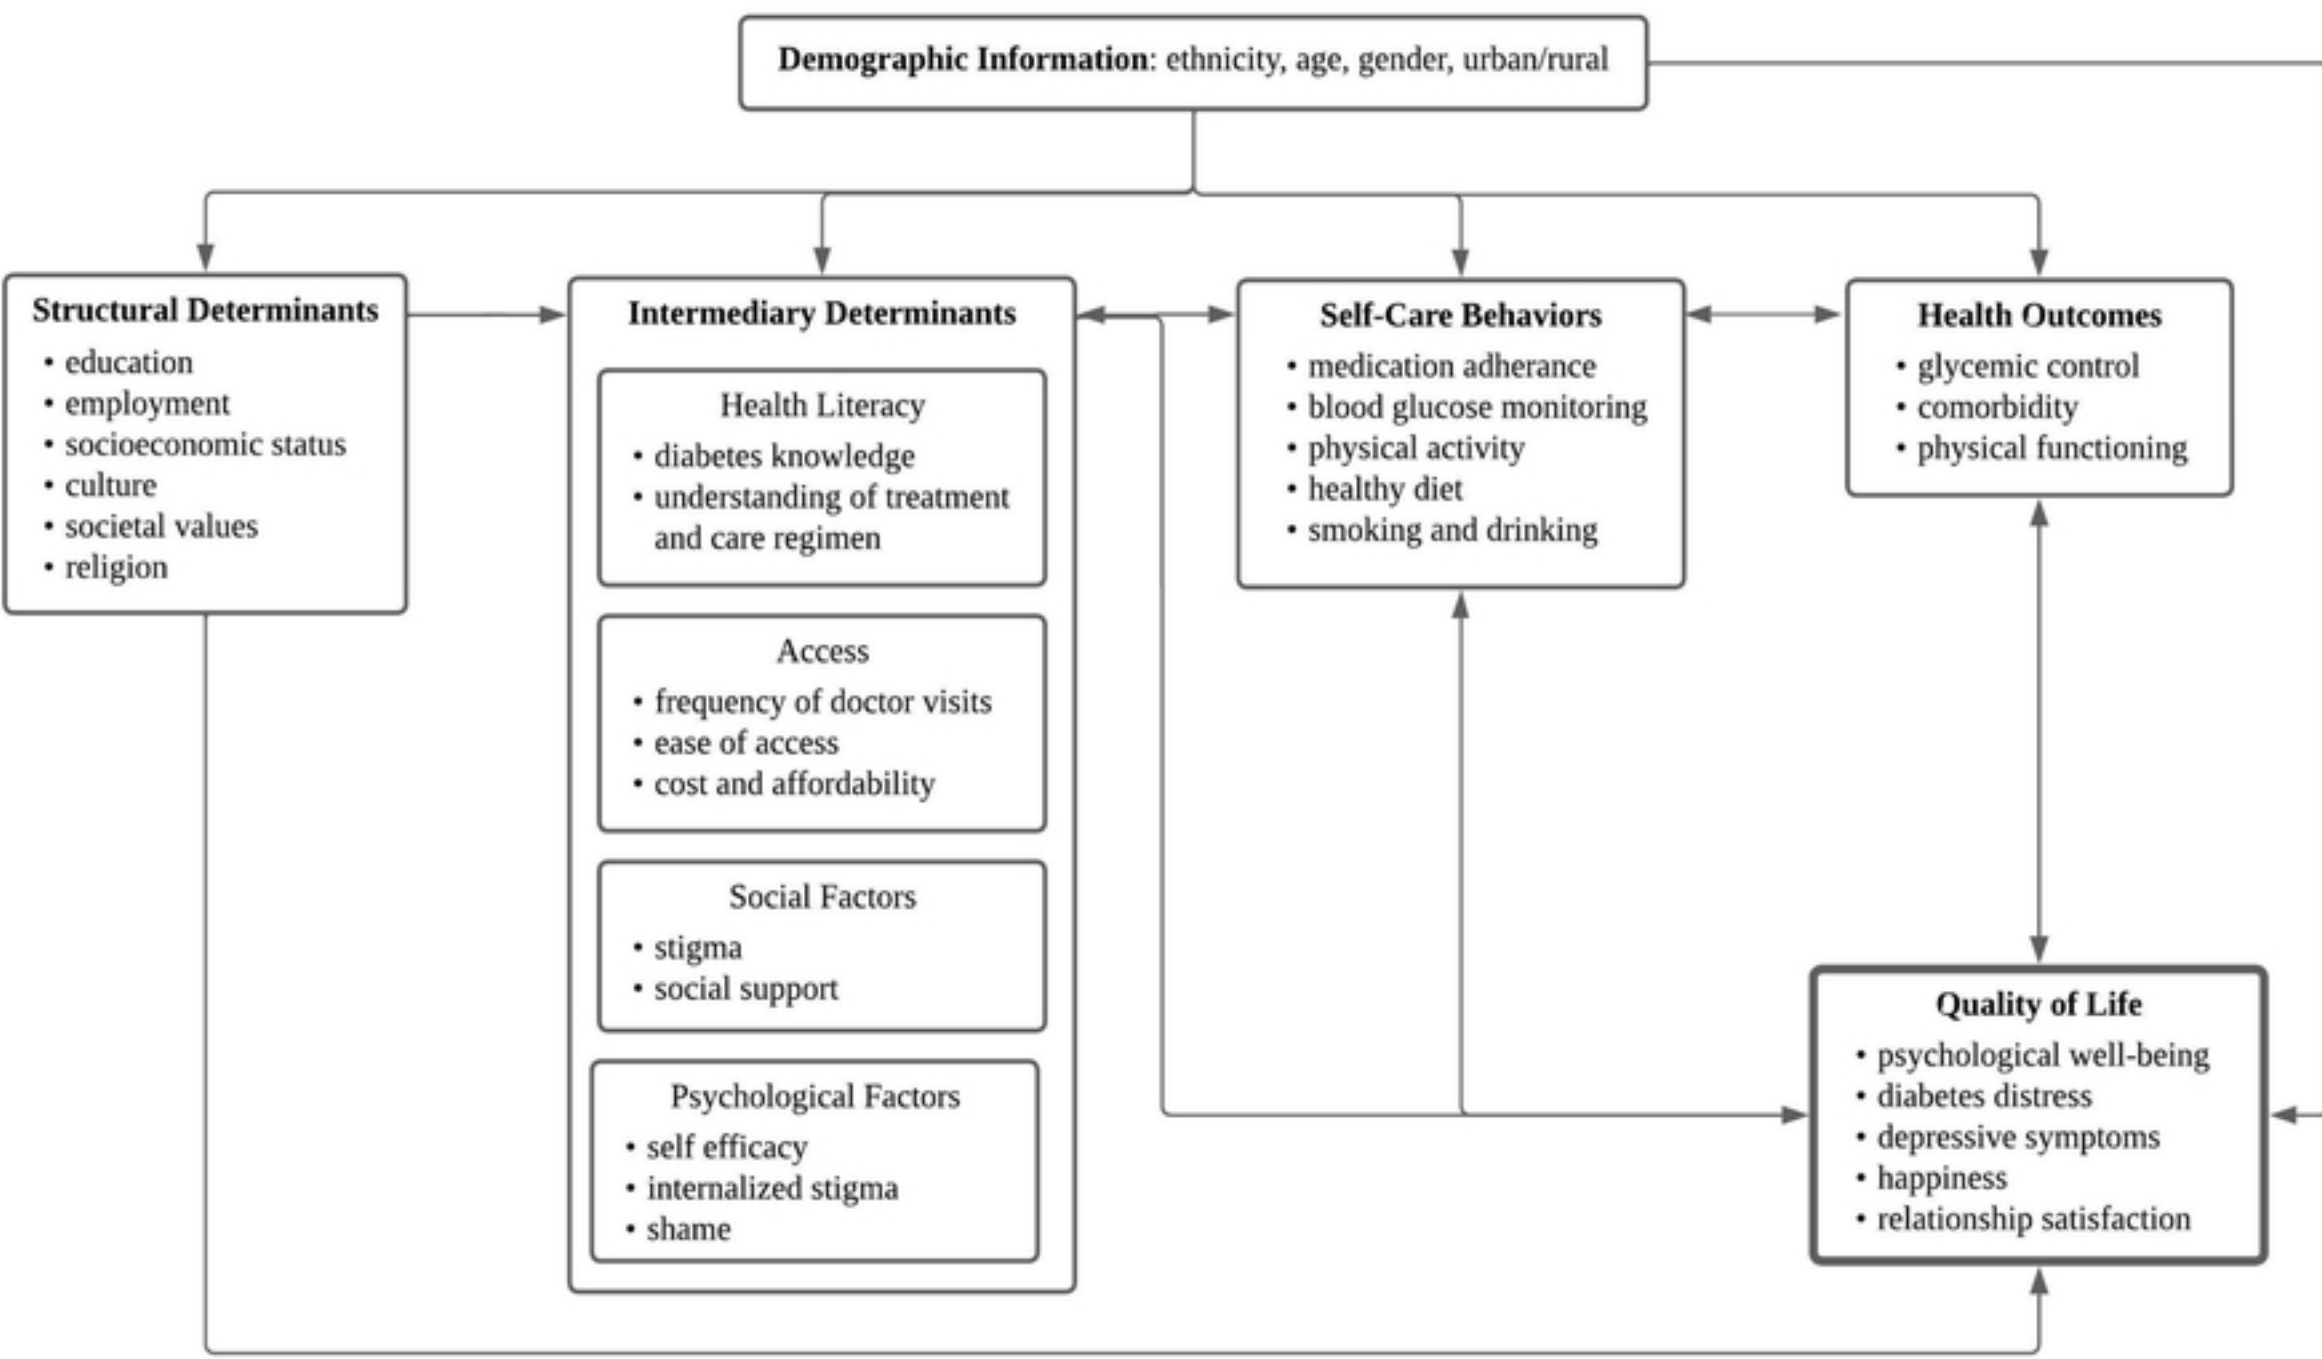

Fig 1

# Association of Covariates with Depression Severity

Depression Severity ■ Moderate/Moderately Severe ■ Mild ■ Minimal

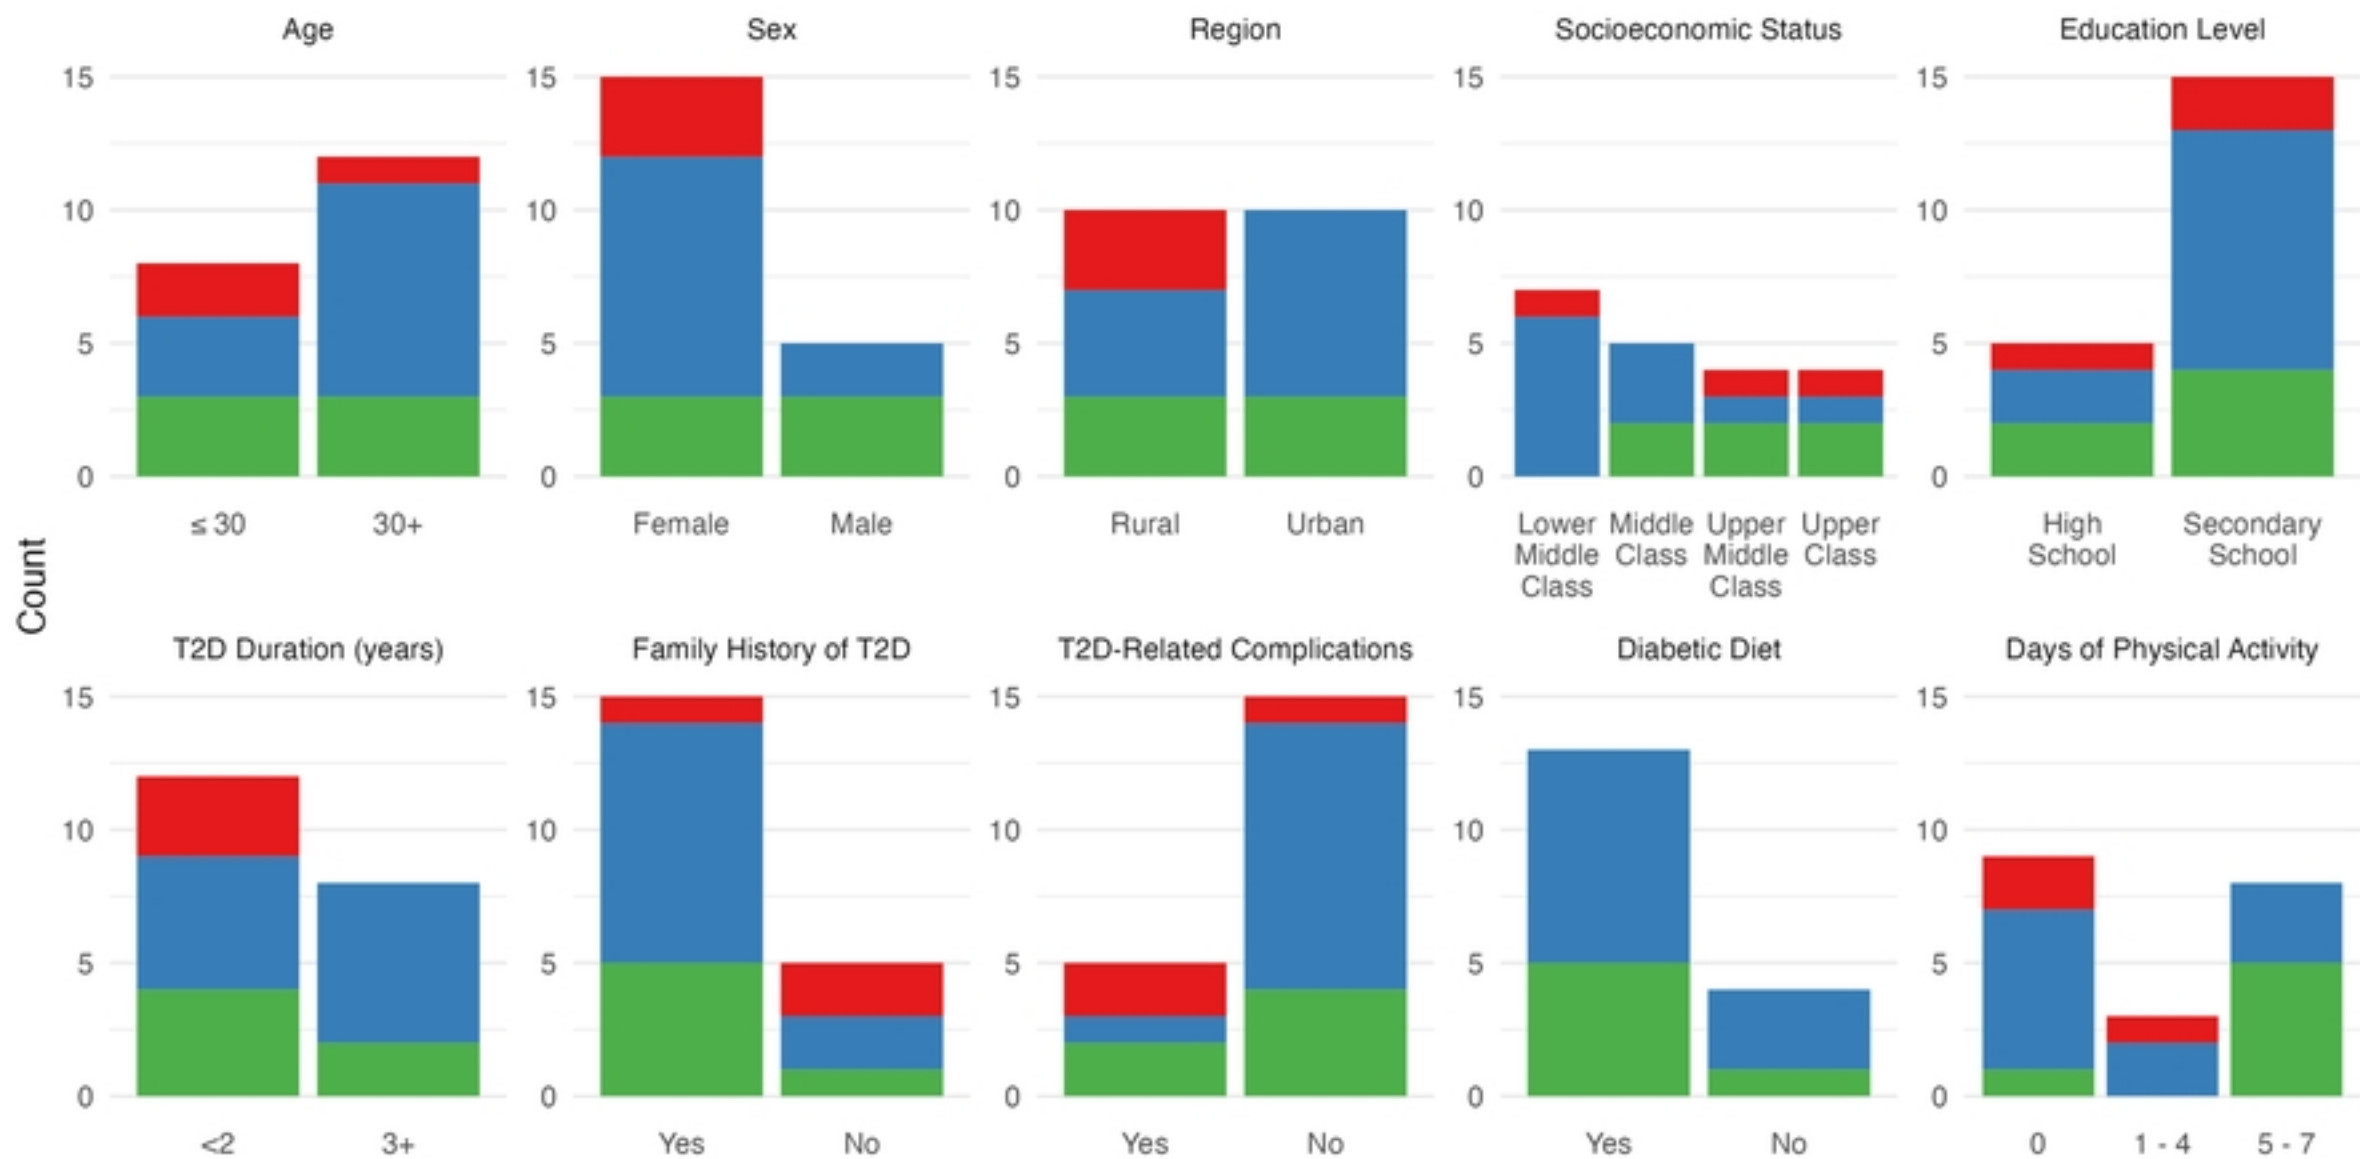

Fig 2
